# Supplementary material
Source: publisher site journal article supplement (https://www.dovepress.com/article/322812)
Supplement: Supplementary file 1 [file get_supplementary_file.php]

**supplementary tables:**

supplementary table 1 Proportion of BSI based on pathogen resistance phenotype from 2010-2018

|  | 2010 | 2011 | 2012 | 2013 | 2014 | 2015 | 2016 | 2017 | 2018 |
| --- | --- | --- | --- | --- | --- | --- | --- | --- | --- |
| GNB | 33 | 37 | 72 | 102 | 99 | 127 | 133 | 156 | 76 |
| MDR-GNB | 23 | 30 | 48 | 68 | 71 | 86 | 86 | 91 | 53 |
| EB | 25 | 31 | 55 | 73 | 76 | 97 | 101 | 113 | 61 |
| MDR-EB | 22 | 26 | 38 | 51 | 58 | 68 | 63 | 62 | 41 |
| ESBL-EB | 16 | 8 | 27 | 17 | 13 | 51 | 45 | 57 | 35 |
| CR-EB | 0 | 0 | 1 | 2 | 4 | 6 | 10 | 10 | 8 |
| NFB | 8 | 6 | 16 | 25 | 21 | 28 | 26 | 36 | 11 |
| MDR-NFB | 1 | 4 | 9 | 13 | 13 | 18 | 21 | 27 | 10 |
| CR-NFB | 1 | 1 | 2 | 10 | 2 | 4 | 4 | 10 | 4 |

supplementary table 1(a) The change in percentages of MDR detection rate in all GN-bacteria over the study period.

|  | 2010-2011 | 2012-2013 | 2014-2015 | 2016-2018 |
| --- | --- | --- | --- | --- |
| MDR-GNB | 75.7%(53/70) | 66.7%(116/174) | 69.5%(157/226) | 63.0%(230/365) |

supplementary table 1(b) The change in percentages of MDR detection rate in EB and NF isolates over the study period.

|  | 2010-2012 | 2013-2015 | 2016-2018 |
| --- | --- | --- | --- |
| MDR-EB | 77.5%(86/111) | 71.9%(177/246) | 60.4%(166/275) |
| MDR-NFB | 46.7%(14/30) | 59.4%(44/79) | 79.5%(58/73) |

supplementary table 1(c) The change in the detection rate of ESBL producing Enterobacteriaceae.

|  | 2010-2014 | 2015-2018 |
| --- | --- | --- |
| ESBL-EB | 31.1%(81/260) | 50.5%(188/372) |

supplementary table 1(d) The change in carbapenem-resistant bacteria detection rate from Jan 2010-May 2018 in EB and NF strains.

|  | 2010 | 2011 | 2012 | 2013 | 2014 | 2015 | 2016 | 2017 | 2018 |
| --- | --- | --- | --- | --- | --- | --- | --- | --- | --- |
| CR-EB  (%) | 0/25 | 0/31 | 1/55 | 2/73 | 4/76 | 6/97 | 10/101 | 10/113 | 8/61 |
| 0 | 0 | 1.8 | 2.7 | 5.3 | 6.2 | 9.9 | 8.8 | 13.1 |
| CR-NFB  (%) | 1/8 | 1/6 | 2/16 | 10/25 | 2/21 | 4/28 | 4/28 | 10/36 | 4/11 |
| 12.5 | 16.7 | 12.5 | 40.0 | 9.5 | 14.3 | 14.3 | 27.8 | 36.4 |
| CR-GNB  (%) | 1/33 | 1/37 | 3/72 | 11/102 | 6/99 | 10/127 | 14/133 | 20/156 | 12/76 |
| 3.0 | 2.7 | 4.2 | 10.8 | 6.1 | 7.9 | 10.5 | 12.8 | 15.8 |

supplementary table 2 7-day mortality rate of patients with BSI: *Enterobacteriaceae* vs. non-fermenting bacteria BSI

| Strains | No.(%) | 7day mortality(%) |
| --- | --- | --- |
| Gram negative bacteria | 835 | 106（12.7%） |
| Enterobacteriaceae | 632 | 61(9.7%) |
| Escherichia coli | 339 | 38（11.2%） |
| Klebsiella pneumoniae | 197 | 22（11.2%） |
| Enterobacter cloacae | 33 | 1（3.0%） |
| Other EB | 63 | 0 |
| Non fermentative bacteria | 177 | 40(22.6%) |
| Pseudomonas aeruginosa | 109 | 15（13.8%） |
| Acinetobacter baumannii | 25 | 16（64.0%） |
| Stenotrophomonas maltophilia | 20 | 7（35.0%） |
| Other NFB | 24 | 2(8.7%) |
| Other GNB | 26 | 5(19.2%) |

supplementary table 3 Impact of pathogen antibiotic resistance profile on 7day-mortality of patients with BSI

|  | Strains | No.(%) | 7day mortality(%) | P  OR(95%CI) |
| --- | --- | --- | --- | --- |
| 3 (a) | MDR-EB | 632 |  |  |
|  | yes | 429(67.9%) | 49(11.4%) | 0.028 |
|  | no | 203(32.1%) | 12(5.9%) | 2.052(1.066-3.950) |
|  | MDR-NFB | 177 |  |  |
|  | yes | 116（65.5%） | 26（22.4%） | 0.935 |
|  | no | 61（34.5%） | 14（23.0%） | 0.970(0.463-2.031) |
| 3 (b) | ESBL-E.coli |  |  |  |
|  | yes | 186(54.9) | 19(10.2) | 0.522 |
|  | no | 153(45.1) | 19(12.4) | 0.802(0.408-1.576) |
|  | ESBL-K.pneum |  |  |  |
|  | yes | 59(29.9) | 5(8.5) | 0.433 |
|  | no | 138(70.1) | 17(12.3) | 0.659(0.231-1.879) |
| 3 (c) | CR-E.coli |  |  |  |
|  | yes | 8(2.4) | 1(12.5) | 0.907 |
|  | no | 331(97.6) | 37(11.2) | 1.135(0.136-9.485) |
|  | CR-K.pneum |  |  |  |
|  | yes | 25(12.7) | 9(36.0) | ＜0.001 |
|  | no | 172(87.3) | 13(7.6) | 6.880(2.548-18.576) |
| 3 (d) | CR-NFB |  |  |  |
|  | yes | 38（21.5%） | 17（44.7%） | ＜0.001 |
|  | no | 139（78.5%） | 23（16.5%） | 4.083(1.871-8.910) |
